# Supplementary material for: The influence of the ligand chelate effect on iron-amine-catalysed Kumada cross-coupling
Source: Royal Society of Chemistry journal article supplement (doi:10.1039/c6dt01823h), 2016-01-01
Supplement: c6dt01823h1.pdf [file c6dt01823h1.pdf]

## The influence of the ligand chelate effect on iron-amine-catalysed Kumada cross-coupling

Robin B. Bedford,<sup>a\*</sup> Peter B. Brenner,<sup>a</sup> David Elorriaga,<sup>a</sup> Jeremy, N. Harvey<sup>b</sup> and Joshua Nunn.<sup>a</sup>

*a. School of Chemistry, University of Bristol, Cantock's Close, Bristol, BS8 1TS, UK. E-mail: r.bedford@bristol.ac.uk*

*b. Quantum Chemistry and Physical Chemistry Section, Department of Chemistry, University of Leuven (KU Leuven), Celestijnenlaan 200F – box 2404, Leuven, Belgium.*

### SUPPORTING INFORMATION

#### Crystallographic Experimental

X-ray diffraction experiments on single crystal of **9** were carried out at 100K on a Bruker Proteum Microstar diffractometer using Cu-K $\alpha$  radiation ( $\lambda = 1.54178 \text{ \AA}$ ) and on **8** at 100K on a Bruker APEX II diffractometer using Mo-K $\alpha$  radiation ( $\lambda = 0.71073 \text{ \AA}$ ). Data collections were performed using a CCD area detector from a single crystal mounted on a glass fibre. Intensities were integrated<sup>S1</sup> from several series of exposures measuring  $0.5^\circ$  in  $\omega$  or  $\varphi$ . Absorption corrections were based on equivalent reflections using SADABS.<sup>S2</sup> The structures were solved using SHELXS and refined against all Fo2 data with hydrogen atoms riding in calculated positions using SHELXL.<sup>S3</sup> The structures have been deposited at the Cambridge Crystallographic Data Centre, CCDC numbers for **8** and **9**, CCDC 1478297 and CCDC 1478298 respectively.

## Crystallographic Data

|                                                |                                                                  |                                                                  |
|------------------------------------------------|------------------------------------------------------------------|------------------------------------------------------------------|
| Identification code                            | <b>8</b>                                                         | <b>9·3CH<sub>3</sub>CN</b>                                       |
| Empirical formula                              | C <sub>12</sub> H <sub>30</sub> Cl <sub>2</sub> FeN <sub>4</sub> | C <sub>20</sub> H <sub>41</sub> Cl <sub>2</sub> FeN <sub>7</sub> |
| Formula weight                                 | 357.15                                                           | 506.35                                                           |
| Temperature/K                                  | 100                                                              | 100                                                              |
| Crystal system                                 | monoclinic                                                       | triclinic                                                        |
| Space group                                    | C2/c                                                             | P-1                                                              |
| a/Å                                            | 14.884(3)                                                        | 8.4114(17)                                                       |
| b/Å                                            | 7.9168(16)                                                       | 13.145(3)                                                        |
| c/Å                                            | 14.972(3)                                                        | 13.243(3)                                                        |
| α/°                                            | 90                                                               | 65.49(3)                                                         |
| β/°                                            | 104.91(3)                                                        | 81.50(3)                                                         |
| γ/°                                            | 90                                                               | 81.42(3)                                                         |
| Volume/Å <sup>3</sup>                          | 1704.7(6)                                                        | 1311.5(6)                                                        |
| Z                                              | 4                                                                | 2                                                                |
| ρ <sub>calc</sub> /cm <sup>3</sup>             | 1.392                                                            | 1.282                                                            |
| μ/mm <sup>-1</sup>                             | 1.192                                                            | 0.799                                                            |
| F(000)                                         | 760.0                                                            | 540.0                                                            |
| Crystal size/mm <sup>3</sup>                   | 0.24 × 0.2 × 0.15                                                | 0.6 × 0.4 × 0.4                                                  |
| Radiation                                      | MoKα (λ = 0.71073)                                               | CuKα (λ = 1.54178)                                               |
| 2Θ range for data collection/°                 | 5.632 to 54.964                                                  | 3.396 to 51.728                                                  |
| Index ranges                                   | -19 ≤ h ≤ 19<br>-10 ≤ k ≤ 10<br>-18 ≤ l ≤ 19                     | -6 ≤ h ≤ 9<br>-15 ≤ k ≤ 15<br>-15 ≤ l ≤ 15                       |
| Reflections collected                          | 11668                                                            | 8897                                                             |
| Independent reflections                        | 1951 [R <sub>int</sub> = 0.0560,<br>R <sub>sigma</sub> = 0.0429] | 4071 [R <sub>int</sub> = 0.0353,<br>R <sub>sigma</sub> = 0.0508] |
| Data/restraints/parameters                     | 1951/0/90                                                        | 4071/0/278                                                       |
| Goodness-of-fit on F <sup>2</sup>              | 0.891                                                            | 1.206                                                            |
| Final R indexes [I ≥ 2σ (I)]                   | R <sub>1</sub> = 0.0383, wR <sub>2</sub> =<br>0.1083             | R <sub>1</sub> = 0.0512, wR <sub>2</sub> =<br>0.1239             |
| Final R indexes [all data]                     | R <sub>1</sub> = 0.0588, wR <sub>2</sub> =<br>0.1245             | R <sub>1</sub> = 0.0515, wR <sub>2</sub> =<br>0.1240             |
| Largest diff. peak/hole / e<br>Å <sup>-3</sup> | 0.47/-0.58                                                       | 0.61/-0.49                                                       |

**Figure S1.** Structure of complex **8**, thermal ellipsoids set at 50% probability, hydrogen atoms omitted for clarity.

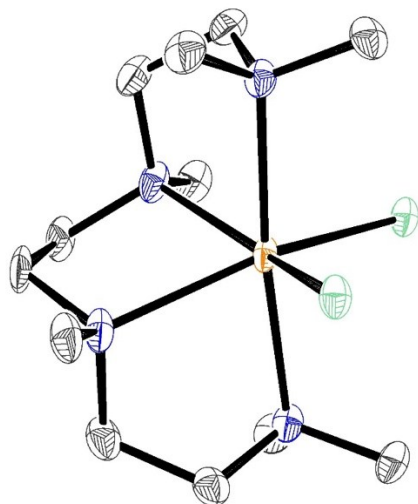

**Figure S2.** Structure of complex **9**, thermal ellipsoids set at 50% probability, hydrogen atoms and three molecules of MeCN omitted for clarity.

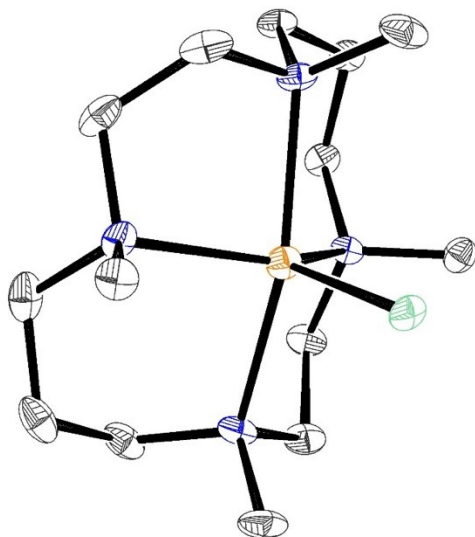

## References

- S1. Bruker-AXS SAINT V7.68A, Madison, Wisconsin.
- S2. G. M. Sheldrick, SADABS V2008/1, University of Göttingen, Germany.
- S3. G. M. Sheldrick, Acta Cryst. 2008, **A64**, 112.
